# Supplementary material
Source: Springer Nature journal article supplement (https://www.springermedizin.de/resource/supplementary/12879_2008_832_MOESM3_ESM.pdf/9449886)

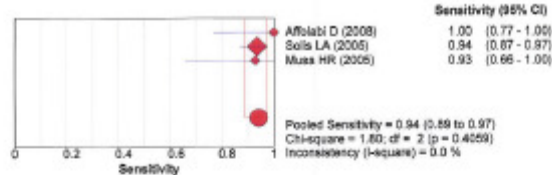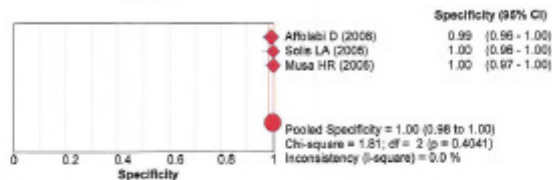

### 3a) Nitrate Reductase Assay (NRA)

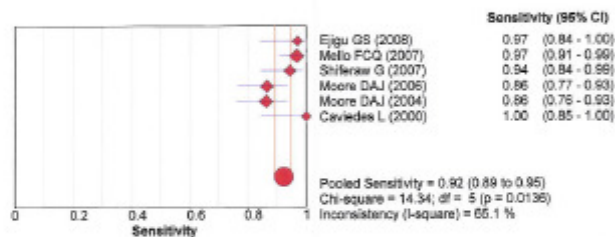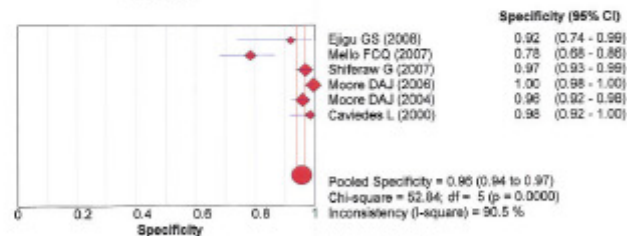

### 3b) Microscopic Observation Drug Susceptibility (MODS)

Supplement: MOESM3 [file 9449886]
